# Supplementary material for: Evaluation of the Contribution of Signals Originating from Large Blood Vessels to Signals of Functionally Specific Brain Areas
Source: Hindawi journal article supplement (doi:10.1155/2015/234345), 2015-01-01
Supplement: f1 [file 234345.f1.pdf]

Supplementary figures (1-8):

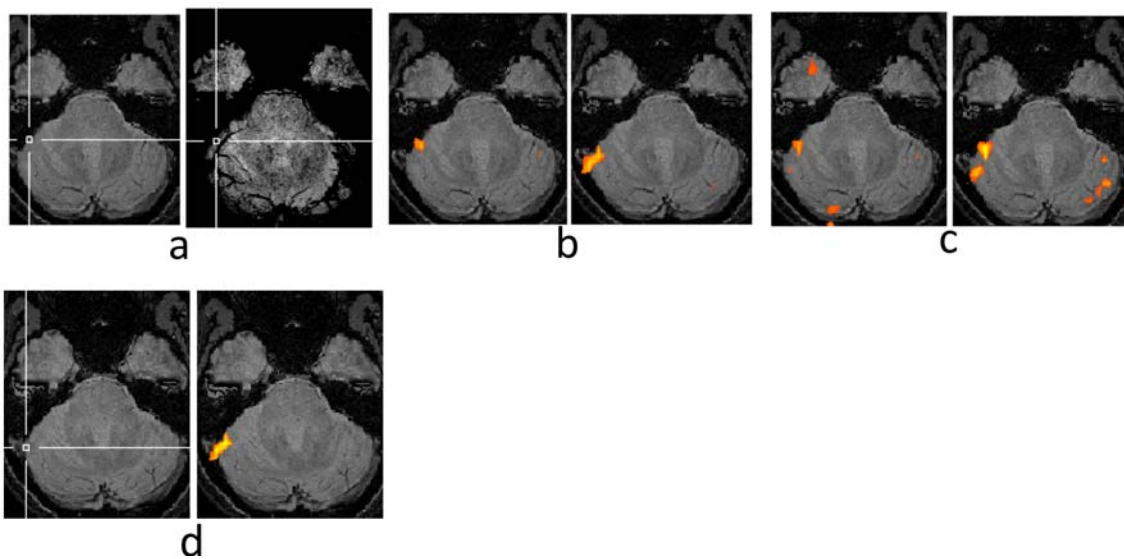

Supplementary Figure 1

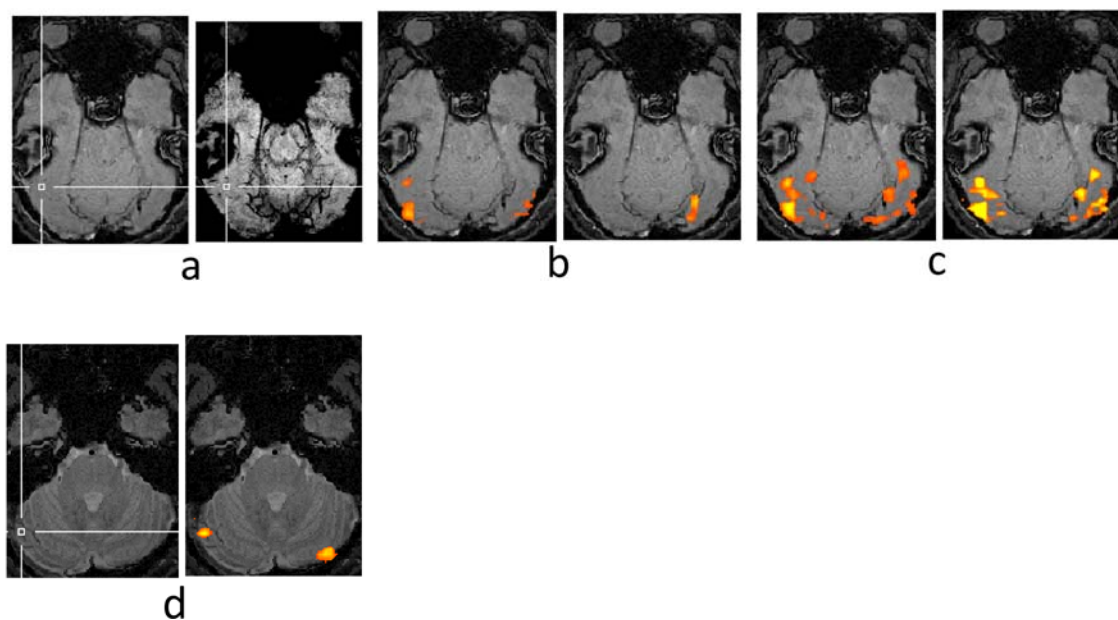

Supplementary Figure 2

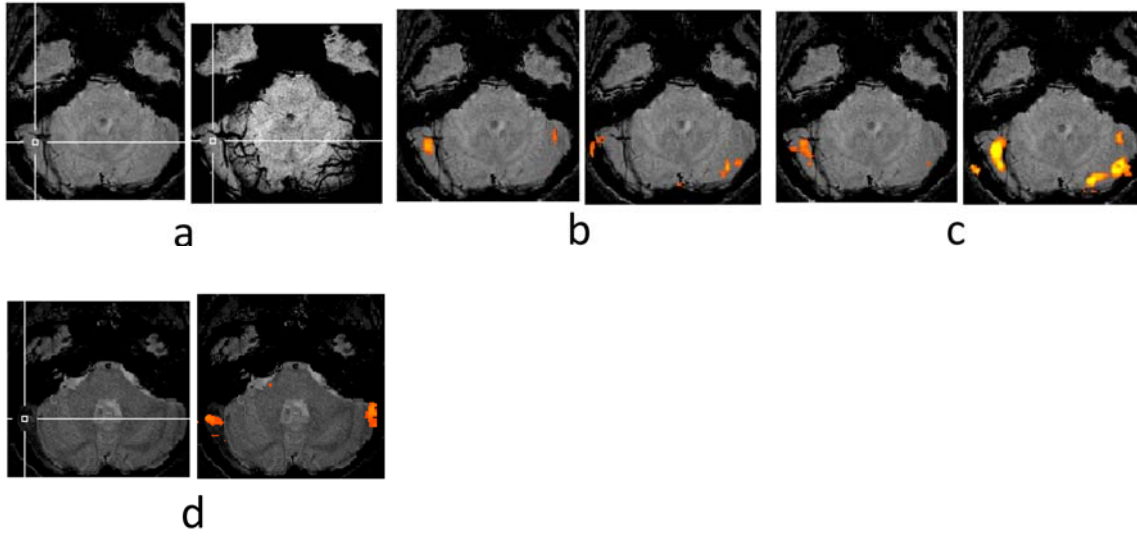

Supplementary Figure 3

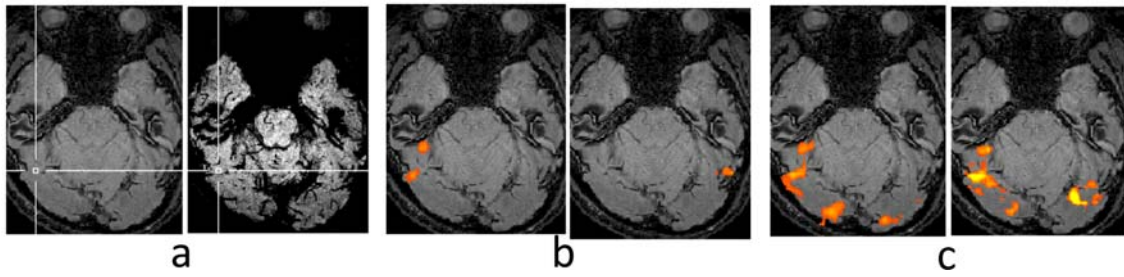

Supplementary 4

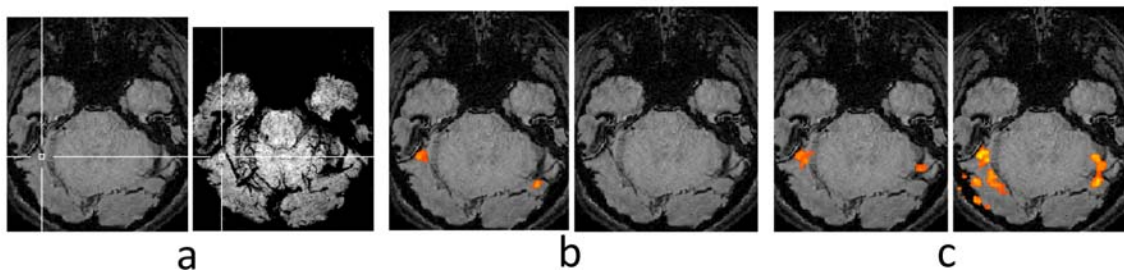

Supplementary 5

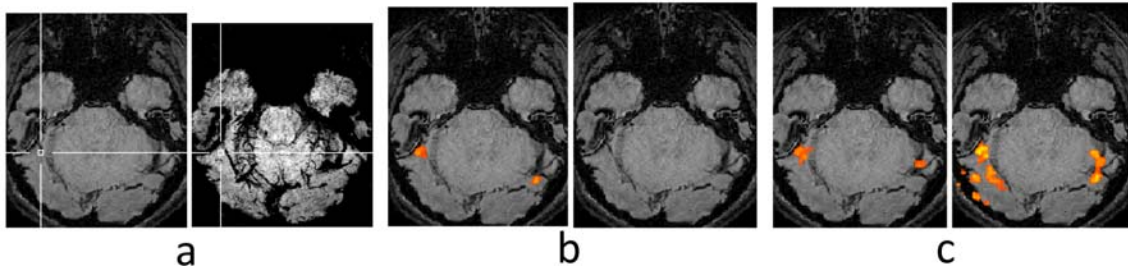

Supplementary 6

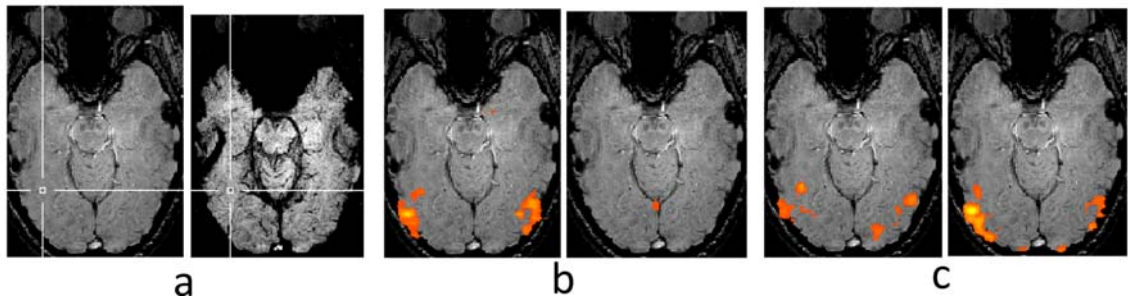

Supplementary 7

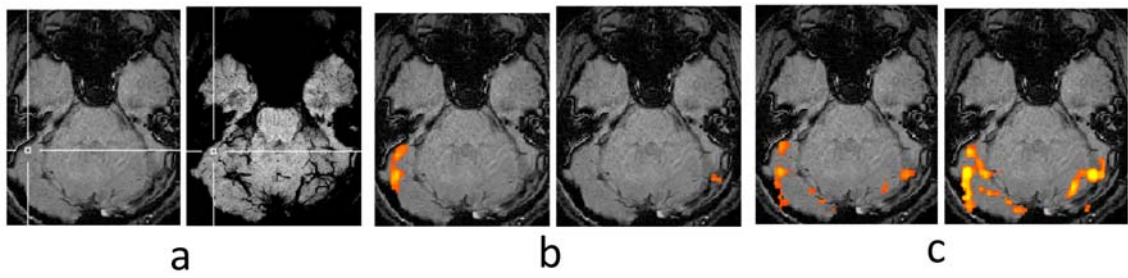

Supplementary 8
